# Supplementary material for: Systemic metabolite profiling reveals sexual dimorphism of AIBP control of metabolism in mice
Source: PubMed Central journal article supplement (PMC8016339; doi:10.1371/journal.pone.0248964), 2021-04-01
Supplement: pone.0248964.s002.pdf [file pone.0248964.s002.pdf]

1 **S1 File**

2

3

**Systemic metabolite profiling reveals sexual dimorphism of  
AIBP control of metabolism in mice**

4

5

6 Jun-dae Kim<sup>a</sup>, Lingping Zhu<sup>a,b</sup>, Quan Sun<sup>a,b</sup>, and Longhou Fang<sup>a,c,d, 1</sup>

7

8 <sup>a</sup> Center for Cardiovascular Regeneration, Houston Methodist Research Institute,

9 <sup>b</sup>Department of Geriatric Medicine, Xiangya Hospital, Central South University, Changsha,

10 Hunan, P.R. China.

11 <sup>c</sup>Department of Cardiovascular Sciences, 6550 Fannin St, TX77030, USA,

12 <sup>d</sup>Weill Cornell Medical College, 407 E 61<sup>st</sup> St, New York, NY 10065, USA

13

14

15 Running title: AIBP role in cellular metabolism

16 1: To whom correspondence should be addressed. Tel: 713-363-9012

17 Email: [lhfang@houstonmethodist.org](mailto:lhfang@houstonmethodist.org)

18

S1 Fig

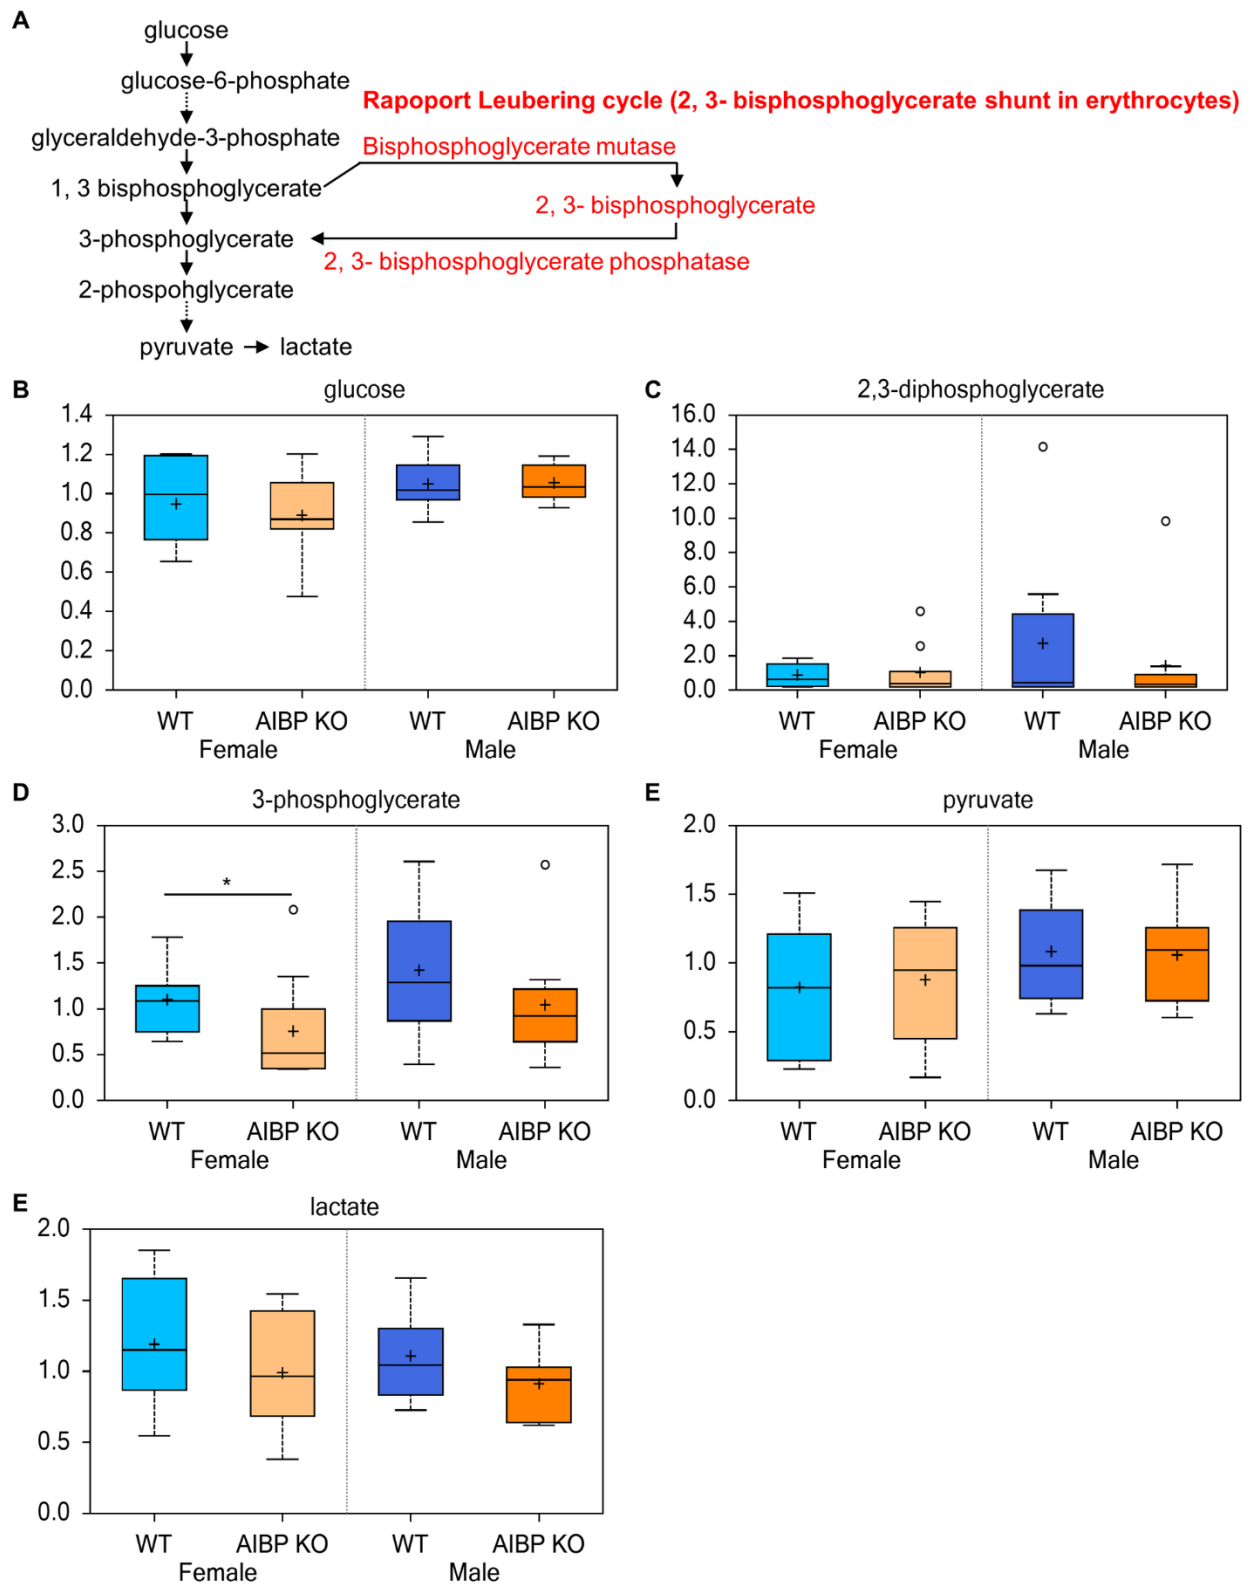

20 **S1 Fig. Loss of AIBP has no effect on glycolysis. A.** Diagram illustration of glycolysis  
21 pathway. The particular shunt that occurs in red blood cells is shown in red. **(B-C)** Metabolites  
22 associated with glycolysis. Except 3-phosphoglycerate, all the rest metabolites are not  
23 significantly changed.

S2 Fig

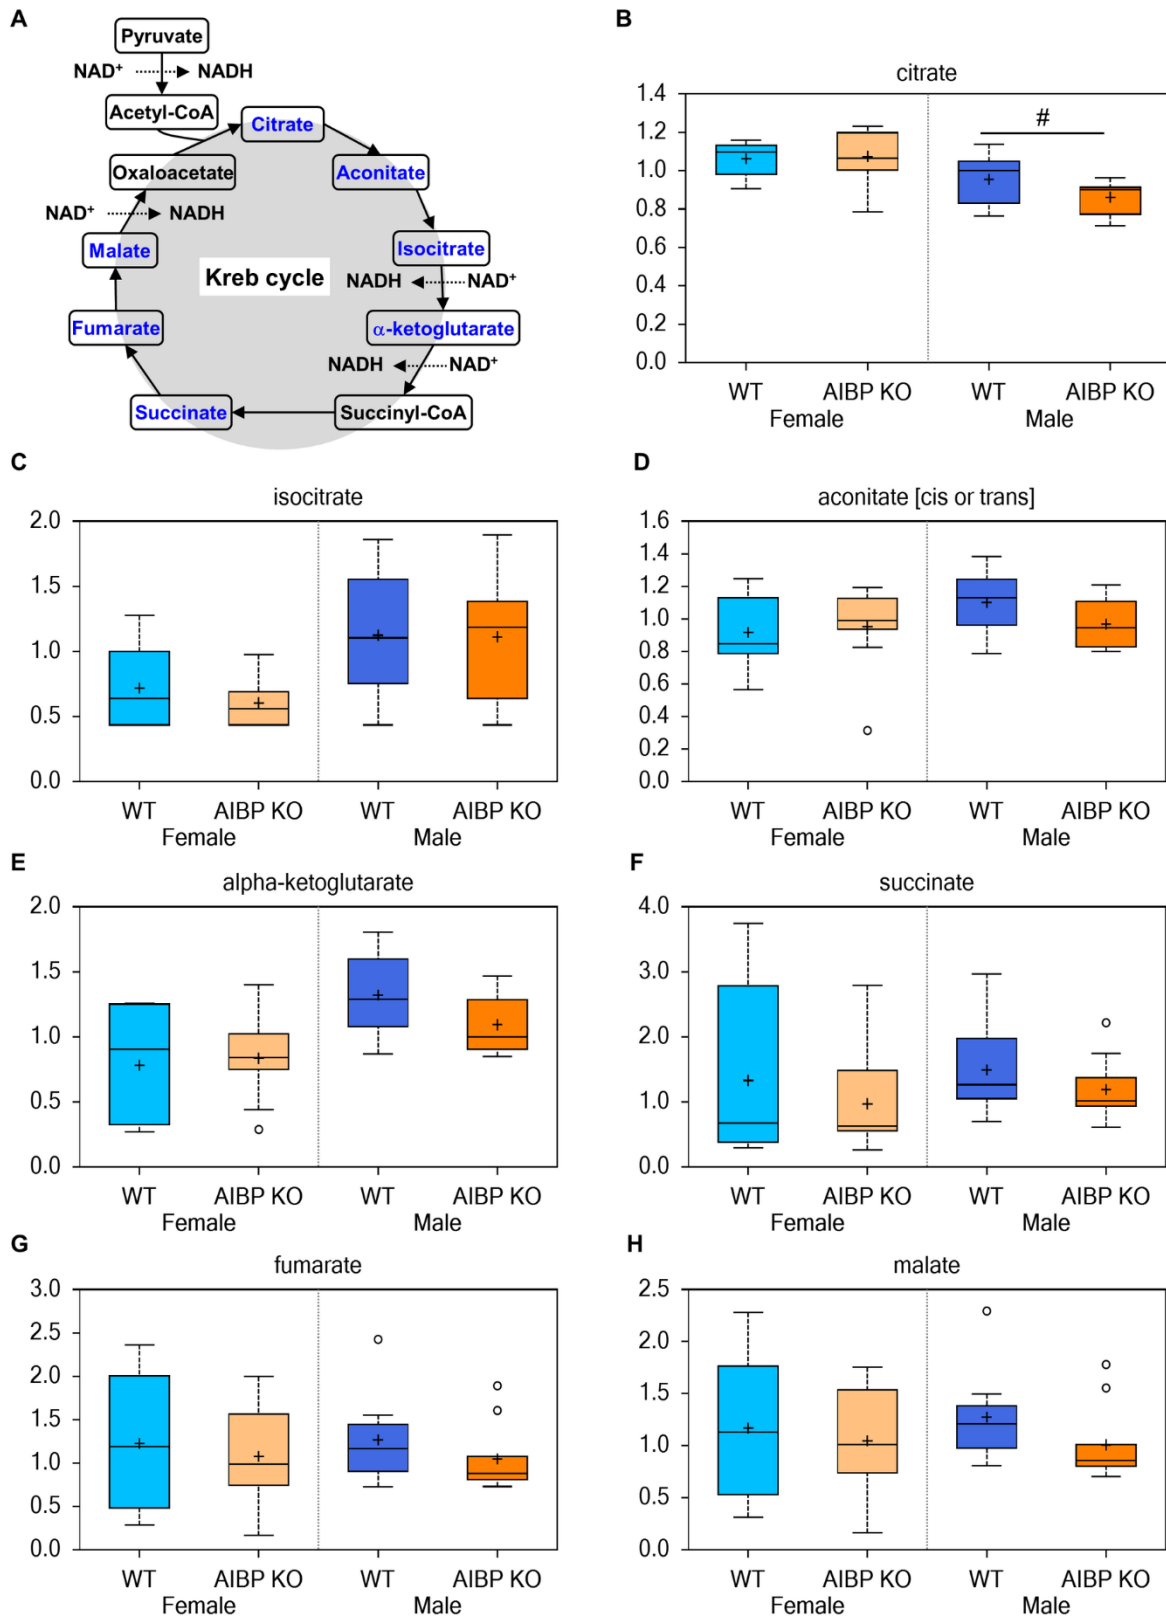

25 **S2 Fig. AIBP deficiency does not affect Krebs cycle.** **A.** Diagram showing Krebs cycle  
26 progression. **(B-H)** Plasma metabolites associated with Krebs cycle. All changes did not reach  
27 statistically significant difference.  $0.1 > p > 0.05$ .
